# Supplementary material
Source: PubMed Central journal article supplement (PMC9183215)
Supplement: mmc1.pdf [file mmc1.pdf]

# THE LANCET

## Supplementary appendix

This appendix formed part of the original submission and has been peer reviewed. We post it as supplied by the authors.

Supplement to: Wong H-L, Hu M, Ke Zhou C, et al. Risk of myocarditis and pericarditis after the COVID-19 mRNA vaccination in the USA: a cohort study in claims databases. *Lancet* 2022; **399**: 2191–99.

## Online Supplementary Material

### Table of Contents for Online Supplementary Material

- Supplemental Table 1. Healthcare Common Procedure Coding System (HCPCS)/ Current Procedural Terminology (CPT) and National Drug Codes (NDC) for COVID-19 vaccines as of June 15, 2021.
- Supplemental Table 2. Select descriptive characteristics of COVID-19 vaccinees aged 18–64 years in four databases
- Supplemental Table 3 (corresponding to Figure 1). Observed and expected number of myocarditis/pericarditis events within 1–7 days following vaccination and O/E Ratios by brand, age, gender, and database
- Supplemental Table 4. Observed and expected number of myocarditis/pericarditis events within 1–7 days following vaccination and O/E Ratios among males 18–25 years by brand, dose number, and database
- Supplemental Table 5. Direct head-to-head comparison of mRNA-1273 and BNT162b2, incidence rates (IRs) and incidence rate ratios (IRRs) comparing the risk of myocarditis/pericarditis following 1–7 days of vaccination, for females aged 18–25 years by brand, dose number, and database
- Supplemental Table 6. Direct head-to-head comparison of mRNA-1273 and BNT162b2, incidence rates (IRs) and incidence rate ratios (IRRs) comparing the risk of myocarditis/pericarditis following 1–7 days of vaccination, for males aged 18–35 years by brand, dose number, and database
- Supplemental Table 7. Direct head-to-head comparison of mRNA-1273 and BNT162b2, incidence rates (IRs) and incidence rate ratios (IRRs) comparing the risk of myocarditis/pericarditis restricted to IP and OP/ED events following 1–7 days of vaccination, for males aged 18–25 years by brand, dose number, and database
- Supplemental Table 8. Direct head-to-head comparison of mRNA-1273 and BNT162b2, incidence rates (IRs) and incidence rate ratios (IRRs) comparing the risk of myocarditis/pericarditis restricted to IP and OP/ED events following 1–7 days of vaccination, for males aged 18–35 years by brand, dose number, and database
- Supplemental Table 9. Direct head-to-head comparison of mRNA-1273 and BNT162b2, incidence rates (IRs) and incidence rate ratios (IRRs) comparing the risk of myocarditis/pericarditis following 1–21 days of vaccination, for males aged 18–25 years by brand, dose number, and database
- Supplemental Table 10. Direct head-to-head comparison of mRNA-1273 and BNT162b2, incidence rates (IRs) and incidence rate ratios (IRRs) comparing the risk of myocarditis/pericarditis following 1–42 days of vaccination, for males aged 18–25 years by brand, dose number, and database
- Supplemental Figure 1. mRNA-1273 and BNT162b2 COVID-19 Accrual by Week, 18–64 years
- Appendix. Person-Time Adjustment for Observation Delay

**Supplemental Table 1. Healthcare Common Procedure Coding System (HCPCS)/ Current Procedural Terminology (CPT) and National Drug Codes (NDC) for COVID-19 vaccines as of June 15, 2021.**

| Description                                                                  | Coding System | Code        |
|------------------------------------------------------------------------------|---------------|-------------|
| PFIZER-BIONTECH COVID-19 VACCINE - bnt162b2 injection, suspension            | NDC           | 59267007801 |
| bnt162b2 3ug/.2mL INTRAMUSCULAR INJECTION, SUSPENSION                        | NDC           | 59267007802 |
| bnt162b2 3ug/.2mL INTRAMUSCULAR INJECTION, SUSPENSION                        | NDC           | 59267007804 |
| SARS-CoV-2 (COVID-19) vaccine, mRNA-BNT162b2 0.1 MG/ML Injectable Suspension | NDC           | 59267100001 |
| SARS-CoV-2 (COVID-19) vaccine, mRNA-BNT162b2 0.1 MG/ML Injectable Suspension | NDC           | 59267100002 |
| SARS-CoV-2 (COVID-19) vaccine, mRNA-BNT162b2 0.1 MG/ML Injectable Suspension | NDC           | 59267100003 |
| PFIZER-BIONTECH COVID-19 VACCINE - bnt162b2 injection, suspension            | NDC           | 59267102501 |
| bnt162b2 .225mg/2.25mL INTRAMUSCULAR INJECTION, SUSPENSION                   | NDC           | 59267102502 |
| bnt162b2 .225mg/2.25mL INTRAMUSCULAR INJECTION, SUSPENSION                   | NDC           | 59267102503 |
| bnt162b2 .225mg/2.25mL INTRAMUSCULAR INJECTION, SUSPENSION                   | NDC           | 59267102504 |
| PFIZER-BIONTECH COVID-19 VACCINE - bnt162b2 injection, suspension            | NDC           | 59267105501 |
| bnt162b2 10ug/.2mL INTRAMUSCULAR INJECTION, SUSPENSION                       | NDC           | 59267105502 |
| bnt162b2 10ug/.2mL INTRAMUSCULAR INJECTION, SUSPENSION                       | NDC           | 59267105504 |
| Pfizer-Biontech Covid-19 Vaccine                                             | CPT4          | 91300       |
| Pfizer-BioNtech Covid-19 Vaccine (Ready to Use)                              | CPT4          | 91305       |
| Pfizer-BioNtech Covid-19 Pediatric Vaccine                                   | CPT4          | 91307       |
| Pfizer-Biontech Covid-19 Vaccine Administration - First Dose                 | CPT4          | 0001A       |
| Pfizer-BioNtech Covid-19 Vaccine (Ready to Use) Administration - First Dose  | CPT4          | 0051A       |
| Pfizer-BioNtech Covid-19 Pediatric Vaccine Administration - First Dose       | CPT4          | 0071A       |
| Pfizer-Biontech Covid-19 Vaccine Administration - Second Dose                | CPT4          | 0002A       |
| Pfizer-BioNtech Covid-19 Vaccine (Ready to Use) Administration - Second Dose | CPT4          | 0052A       |
| Pfizer-BioNtech Covid-19 Pediatric Vaccine Administration - Second Dose      | CPT4          | 0072A       |
| Pfizer-Biontech Covid-19 Vaccine Administration - Third Dose                 | CPT4          | 0003A       |
| Pfizer-BioNtech Covid-19 Vaccine (Ready to Use) Administration - Third Dose  | CPT4          | 0053A       |
| Pfizer-Biontech Covid-19 Vaccine Administration - Booster                    | CPT4          | 0004A       |
| Pfizer-BioNtech Covid-19 Vaccine (Ready to Use) Administration - Booster     | CPT4          | 0054A       |
| SARS-CoV-2 (COVID-19) vaccine, mRNA-1273 0.2 MG/ML Injectable Suspension     | NDC           | 80777027310 |
| SARS-CoV-2 (COVID-19) vaccine, mRNA-1273 0.2 MG/ML Injectable Suspension     | NDC           | 80777027315 |
| SARS-CoV-2 (COVID-19) vaccine, mRNA-1273 0.2 MG/ML Injectable Suspension     | NDC           | 80777027398 |
| SARS-CoV-2 (COVID-19) vaccine, mRNA-1273 0.2 MG/ML Injectable Suspension     | NDC           | 80777027399 |
| Moderna Covid-19 Vaccine                                                     | CPT4          | 91301       |
| Moderna Covid-19 Vaccine (Low Dose)                                          | CPT4          | 91306       |
| Moderna Covid-19 Vaccine Administration - First Dose                         | CPT4          | 0011A       |
| Moderna Covid-19 Vaccine Administration - Second Dose                        | CPT4          | 0012A       |
| Moderna Covid-19 Vaccine Administration - Third Dose                         | CPT4          | 0013A       |
| Moderna Covid-19 Vaccine (Low Dose) Administration - Booster                 | CPT4          | 0064A       |

|                                                                                                                                                                                                  |      |       |
|--------------------------------------------------------------------------------------------------------------------------------------------------------------------------------------------------|------|-------|
| Covid-19 vaccine administration inside a patient's home; reported only once per individual home per date of service when only covid-19 vaccine administration is performed at the patient's home | CPT4 | M0201 |
|--------------------------------------------------------------------------------------------------------------------------------------------------------------------------------------------------|------|-------|

Abbreviations: CPT=Current Procedural Terminology; NDC=National Drug Code.

CPT codes Current Procedural Terminology codes were used with permission of the American Medical Association.

© Copyright American Medical Association 2021. All rights reserved.

**Supplemental Table 2. Select descriptive characteristics of COVID-19 vaccinees aged 18–64 years in four databases**

| Characteristics                                     | Data Partner 1   |             | Data Partner 2   |             | Data Partner 3   |             | Data Partner 4   |             |
|-----------------------------------------------------|------------------|-------------|------------------|-------------|------------------|-------------|------------------|-------------|
|                                                     | n                | %           | n                | %           | n                | %           | n                | %           |
| <i>Total vaccinated enrollees</i>                   | <b>6,245,406</b> | <b>100%</b> | <b>2,169,398</b> | <b>100%</b> | <b>3,573,097</b> | <b>100%</b> | <b>3,160,468</b> | <b>100%</b> |
| <i>Total of myocarditis/pericarditis</i>            | <b>154</b>       |             | <b>64</b>        |             | <b>94</b>        |             | <b>99</b>        |             |
| <b>Age (years)</b>                                  |                  |             |                  |             |                  |             |                  |             |
| <b>18-25</b>                                        | 806,375          | 13%         | 289,902          | 13%         | 485,590          | 14%         | 390,543          | 12%         |
| <b>26-35</b>                                        | 997,268          | 16%         | 403,765          | 19%         | 588,293          | 16%         | 598,488          | 19%         |
| <b>36-45</b>                                        | 1,276,890        | 20%         | 473,587          | 22%         | 753,812          | 21%         | 721,733          | 23%         |
| <b>46-55</b>                                        | 1,492,251        | 24%         | 497,423          | 23%         | 856,577          | 24%         | 751,041          | 24%         |
| <b>56-64</b>                                        | 1,672,622        | 27%         | 504,721          | 23%         | 888,825          | 25%         | 698,663          | 22%         |
| <b>Missing/Unknown</b>                              | --               | --          | --               | --          | --               | --          | --               | --          |
| <b>Sex</b>                                          |                  |             |                  |             |                  |             |                  |             |
| <b>Male</b>                                         | 3,339,168        | 53%         | 1,148,857        | 53%         | 1,898,171        | 53%         | 1,654,341        | 52%         |
| <b>Female</b>                                       | 2,906,238        | 47%         | 1,020,541        | 47%         | 1,674,926        | 47%         | 1,506,127        | 48%         |
| <b>Missing/Unknown</b>                              | --               | --          | --               | --          | --               | --          | --               | --          |
| <b>Urban/Rural</b>                                  |                  |             |                  |             |                  |             |                  |             |
| <b>Urban</b>                                        | --               | --          | 2,065,668        | 95%         | 3,117,269        | 87%         | 2,987,073        | 95%         |
| <b>Rural</b>                                        | --               | --          | 94,754           | 4%          | 455,366          | 13%         | 168,825          | 5%          |
| <b>Missing/Unknown</b>                              | --               | --          | 8,976            | 0%          | 462              | 0%          | 4,570            | 0%          |
| <b>Prior COVID-19 diagnosis since April 1, 2020</b> | 439,508          | 7%          | 148,500          | 7%          | 237,519          | 7%          | 222,820          | 7%          |

Note: Percentages may not add up to 100% due to rounding.

\* Prior COVID-19 diagnosis was identified via International Classification of Diseases, Tenth Revision, Clinical Modification (ICD-10-CM) code U07.1

**Supplemental Table 3 (corresponding to Figure 1). Observed and expected number of myocarditis/pericarditis events within 1–7 days following vaccination and O/E Ratios by brand, age, gender, and database**

|                          | BNT162b2         |      |                                |      |                       | mRNA-1273        |      |                                |      |                       |
|--------------------------|------------------|------|--------------------------------|------|-----------------------|------------------|------|--------------------------------|------|-----------------------|
|                          | Number of events |      | Rate (per 100,000 person-days) |      | O/E Ratio<br>[95% CI] | Number of events |      | Rate (per 100,000 person-days) |      | O/E Ratio<br>[95% CI] |
|                          | O                | E    | O                              | E    |                       | O                | E    | O                              | E    |                       |
| <b>18–25 years</b>       |                  |      |                                |      |                       |                  |      |                                |      |                       |
| <b>Data Partner 2</b>    |                  |      |                                |      |                       |                  |      |                                |      |                       |
| <b>Any dose (Male)</b>   | 11               | 1.02 | 1.07                           | 0.10 | 10.74 [5.36, 19.21]   | 5                | 0.55 | 0.90                           | 0.10 | 9.07 [2.95, 21.17]    |
| <b>Any dose (Female)</b> | 2                | 0.53 | 0.17                           | 0.04 | 3.78 [0.46, 13.66]    | 3                | 0.28 | 0.48                           | 0.04 | 10.83 [2.23, 31.64]   |
| <b>Data Partner 3</b>    |                  |      |                                |      |                       |                  |      |                                |      |                       |
| <b>Any dose (Male)</b>   | 18               | 1.86 | 1.06                           | 0.11 | 9.69 [5.74, 15.31]    | 10               | 1.00 | 1.09                           | 0.11 | 9.97 [4.78, 18.33]    |
| <b>Any dose (Female)</b> | 4                | 0.89 | 0.20                           | 0.04 | 4.47 [1.22, 11.45]    | 2                | 0.47 | 0.19                           | 0.04 | 4.21 [0.51, 15.21]    |
| <b>Data Partner 4</b>    |                  |      |                                |      |                       |                  |      |                                |      |                       |
| <b>Any dose (Male)</b>   | 10               | 2.08 | 0.73                           | 0.15 | 4.80 [2.30, 8.82]     | 14               | 1.05 | 2.01                           | 0.15 | 13.30 [7.27, 22.31]   |
| <b>Any dose (Female)</b> | 9                | 0.97 | 0.54                           | 0.06 | 9.28 [4.24, 17.62]    | 1                | 0.49 | 0.12                           | 0.06 | 2.06 [0.05, 11.48]    |
| <b>26–35 years</b>       |                  |      |                                |      |                       |                  |      |                                |      |                       |
| <b>Data Partner 2</b>    |                  |      |                                |      |                       |                  |      |                                |      |                       |
| <b>Any dose (Male)</b>   | 5                | 1.30 | 0.35                           | 0.09 | 3.85 [1.25, 8.97]     | 3                | 0.74 | 0.37                           | 0.09 | 4.06 [0.84, 11.85]    |
| <b>Any dose (Female)</b> | 1                | 0.75 | 0.06                           | 0.05 | 1.33 [0.03, 7.40]     | 1                | 0.39 | 0.12                           | 0.05 | 2.56 [0.06, 14.25]    |
| <b>Data Partner 3</b>    |                  |      |                                |      |                       |                  |      |                                |      |                       |
| <b>Any dose (Male)</b>   | 9                | 2.09 | 0.44                           | 0.10 | 4.30 [1.96, 8.16]     | 6                | 1.23 | 0.50                           | 0.10 | 4.89 [1.80, 10.65]    |
| <b>Any dose (Female)</b> | 1                | 1.07 | 0.04                           | 0.05 | 0.93 [0.02, 5.19]     | 0                | 0.61 | 0.00                           | 0.05 | 0.00 [0.00, 6.05]     |
| <b>Data Partner 4</b>    |                  |      |                                |      |                       |                  |      |                                |      |                       |
| <b>Any dose (Male)</b>   | 12               | 3.09 | 0.56                           | 0.14 | 3.88 [2.00, 6.77]     | 7                | 1.69 | 0.60                           | 0.14 | 4.14 [1.67, 8.54]     |
| <b>Any dose (Female)</b> | 1                | 1.45 | 0.04                           | 0.06 | 0.69 [0.02, 3.85]     | 1                | 0.75 | 0.08                           | 0.06 | 1.34 [0.03, 7.47]     |
| <b>36–45 years</b>       |                  |      |                                |      |                       |                  |      |                                |      |                       |
| <b>Data Partner 2</b>    |                  |      |                                |      |                       |                  |      |                                |      |                       |
| <b>Any dose (Male)</b>   | 3                | 1.77 | 0.18                           | 0.10 | 1.70 [0.35, 4.97]     | 2                | 1.02 | 0.21                           | 0.10 | 1.97 [0.24, 7.11]     |

|                   | BNT162b2         |      |                                |      |                       | mRNA-1273        |      |                                   |      |                       |
|-------------------|------------------|------|--------------------------------|------|-----------------------|------------------|------|-----------------------------------|------|-----------------------|
|                   | Number of events |      | Rate (per 100,000 person-days) |      | O/E Ratio<br>[95% CI] | Number of events |      | Rate (per 100,000<br>person-days) |      | O/E Ratio<br>[95% CI] |
|                   | O                | E    | O                              | E    |                       | O                | E    | O                                 | E    |                       |
| Any dose (Female) | 6                | 1.41 | 0.31                           | 0.07 | 4.26 [1.56,9.27]      | 0                | 0.79 | 0.00                              | 0.07 | 0.00 [0.00,4.69]      |
| Data Partner 3    |                  |      |                                |      |                       |                  |      |                                   |      |                       |
| Any dose (Male)   | 6                | 2.63 | 0.23                           | 0.10 | 2.28 [0.84,4.97]      | 6                | 1.61 | 0.37                              | 0.10 | 3.72 [1.37,8.10]      |
| Any dose (Female) | 2                | 1.98 | 0.07                           | 0.07 | 1.01 [0.12,3.65]      | 0                | 1.19 | 0.00                              | 0.07 | 0.00 [0.00,3.09]      |
| Data Partner 4    |                  |      |                                |      |                       |                  |      |                                   |      |                       |
| Any dose (Male)   | 3                | 3.65 | 0.12                           | 0.14 | 0.82 [0.17,2.40]      | 6                | 2.07 | 0.41                              | 0.14 | 2.90 [1.07,6.32]      |
| Any dose (Female) | 5                | 2.25 | 0.17                           | 0.08 | 2.22 [0.72,5.18]      | 0                | 1.23 | 0.00                              | 0.08 | 0.00 [0.00,3.01]      |
| 46–55 years       |                  |      |                                |      |                       |                  |      |                                   |      |                       |
| Data Partner 2    |                  |      |                                |      |                       |                  |      |                                   |      |                       |
| Any dose (Male)   | 2                | 2.34 | 0.11                           | 0.13 | 0.85 [0.10,3.09]      | 2                | 1.44 | 0.19                              | 0.13 | 1.39 [0.17,5.01]      |
| Any dose (Female) | 3                | 1.80 | 0.15                           | 0.09 | 1.66 [0.34,4.86]      | 2                | 1.09 | 0.17                              | 0.09 | 1.83 [0.22,6.60]      |
| Data Partner 3    |                  |      |                                |      |                       |                  |      |                                   |      |                       |
| Any dose (Male)   | 4                | 3.40 | 0.14                           | 0.12 | 1.18 [0.32,3.02]      | 2                | 2.24 | 0.10                              | 0.12 | 0.89 [0.11,3.23]      |
| Any dose (Female) | 1                | 2.89 | 0.03                           | 0.09 | 0.35 [0.01,1.93]      | 6                | 1.90 | 0.28                              | 0.09 | 3.16 [1.16, 6.88]     |
| Data Partner 4    |                  |      |                                |      |                       |                  |      |                                   |      |                       |
| Any dose (Male)   | 5                | 3.78 | 0.19                           | 0.14 | 1.32 [0.43,3.09]      | 1                | 2.26 | 0.06                              | 0.14 | 0.44 [0.01, 2.46]     |
| Any dose (Female) | 7                | 2.62 | 0.24                           | 0.09 | 2.67 [1.07,5.50]      | 1                | 1.52 | 0.06                              | 0.09 | 0.66 [0.02,3.66]      |
| 56–64 years       |                  |      |                                |      |                       |                  |      |                                   |      |                       |
| Data Partner 2    |                  |      |                                |      |                       |                  |      |                                   |      |                       |
| Any dose (Male)   | 3                | 2.79 | 0.18                           | 0.16 | 1.08 [0.22,3.15]      | 1                | 1.94 | 0.08                              | 0.16 | 0.52 [0.01,2.88]      |
| Any dose (Female) | 8                | 2.18 | 0.43                           | 0.12 | 3.67 [1.58,7.23]      | 1                | 1.50 | 0.08                              | 0.12 | 0.67 [0.02,3.72]      |
| Data Partner 3    |                  |      |                                |      |                       |                  |      |                                   |      |                       |
| Any dose (Male)   | 5                | 4.52 | 0.17                           | 0.15 | 1.11 [0.36,2.58]      | 3                | 3.35 | 0.14                              | 0.15 | 0.90 [0.18, 2.62]     |
| Any dose (Female) | 5                | 3.49 | 0.16                           | 0.11 | 1.43 [0.47,3.35]      | 4                | 2.60 | 0.17                              | 0.11 | 1.54 [0.42,3.94]      |
| Data Partner 4    |                  |      |                                |      |                       |                  |      |                                   |      |                       |
| Any dose (Male)   | 5                | 4.18 | 0.21                           | 0.18 | 1.20 [0.39,2.79]      | 4                | 2.78 | 0.25                              | 0.18 | 1.44 [0.39,3.69]      |

|                       | BNT162b2         |       |                                |      |                       | mRNA-1273        |      |                                |      |                       |
|-----------------------|------------------|-------|--------------------------------|------|-----------------------|------------------|------|--------------------------------|------|-----------------------|
|                       | Number of events |       | Rate (per 100,000 person-days) |      | O/E Ratio<br>[95% CI] | Number of events |      | Rate (per 100,000 person-days) |      | O/E Ratio<br>[95% CI] |
|                       | O                | E     | O                              | E    |                       | O                | E    | O                              | E    |                       |
| Any dose (Female)     | 5                | 2.91  | 0.20                           | 0.12 | 1.72 [0.56,4.01]      | 2                | 1.90 | 0.12                           | 0.12 | 1.05 [0.13,3.80]      |
| <b>Overall</b>        |                  |       |                                |      |                       |                  |      |                                |      |                       |
| <b>Data Partner 2</b> |                  |       |                                |      |                       |                  |      |                                |      |                       |
| Any dose (Male)       | 24               | 9.05  | 0.32                           | 0.12 | 2.65 [1.70,3.94]      | 13               | 5.48 | 0.28                           | 0.12 | 2.37 [1.26,4.06]      |
| Any dose (Female)     | 20               | 6.58  | 0.23                           | 0.08 | 3.04 [1.86,4.70]      | 7                | 3.85 | 0.14                           | 0.08 | 1.82 [0.73,3.75]      |
| <b>Data Partner 3</b> |                  |       |                                |      |                       |                  |      |                                |      |                       |
| Any dose (Male)       | 42               | 14.32 | 0.34                           | 0.12 | 2.93 [2.11,3.96]      | 27               | 9.16 | 0.35                           | 0.12 | 2.95 [1.94,4.29]      |
| Any dose (Female)     | 13               | 10.17 | 0.09                           | 0.07 | 1.28 [0.68,2.19]      | 12               | 6.43 | 0.14                           | 0.07 | 1.87 [0.96,3.26]      |
| <b>Data Partner 4</b> |                  |       |                                |      |                       |                  |      |                                |      |                       |
| Any dose (Male)       | 35               | 16.80 | 0.31                           | 0.15 | 2.08 [1.45,2.90]      | 32               | 9.80 | 0.49                           | 0.15 | 3.27 [2.23,4.61]      |
| Any dose (Female)     | 27               | 10.13 | 0.22                           | 0.08 | 2.67 [1.76,3.88]      | 5                | 5.71 | 0.07                           | 0.08 | 0.88 [0.28,2.04]      |

O=Observed rate after vaccination in the databases; E=Expected rate in the absence of vaccination, i.e., incidence rates estimated within each database in 2019 stratified by sex and age; Expected rate is not available in Data Partner 1 as the database population is a subset of the whole population having observed biologics use or meeting other inclusion criteria. CI=confidence interval;



**Supplemental Table 4. Observed and expected number of myocarditis/pericarditis events within 1–7 days following vaccination and O/E Ratios among males 18–25 years by brand, dose number, and database\*\***

|                       | BNT162b2         |      |                                |      |                     | mRNA-1273        |      |                                |      |                     |
|-----------------------|------------------|------|--------------------------------|------|---------------------|------------------|------|--------------------------------|------|---------------------|
|                       | Number of events |      | Rate (per 100,000 person-days) |      | O/E Ratio [95% CI]  | Number of events |      | Rate (per 100,000 person-days) |      | O/E Ratio [95% CI]  |
|                       | O                | E    | O                              | E    |                     | O                | E    | O                              | E    |                     |
| <b>Data Partner 2</b> |                  |      |                                |      |                     |                  |      |                                |      |                     |
| Dose 1                | 1                | 0.57 | 0.18                           | 0.10 | 1.76 [0.04,9.83]    | 1                | 0.31 | 0.32                           | 0.10 | 3.22 [0.08,17.96]   |
| Dose 2                | 10               | 0.46 | 2.17                           | 0.10 | 21.85 [10.48,40.18] | 4                | 0.24 | 1.65                           | 0.10 | 16.61 [4.53,42.54]  |
| Any Dose              | 11               | 1.02 | 1.07                           | 0.10 | 10.74 [5.36, 19.21] | 5                | 0.55 | 0.90                           | 0.10 | 9.07 [2.95,21.17]   |
| <b>Data Partner 3</b> |                  |      |                                |      |                     |                  |      |                                |      |                     |
| Dose 1                | 5                | 1.03 | 0.53                           | 0.11 | 4.83 [1.57,11.28]   | 3                | 0.57 | 0.57                           | 0.11 | 5.27 [1.09, 15.40]  |
| Dose 2                | 13               | 0.82 | 1.72                           | 0.11 | 15.77 [8.40,26.97]  | 7                | 0.43 | 1.76                           | 0.11 | 16.13 [6.49,33.24]  |
| Any Dose              | 18               | 1.86 | 1.06                           | 0.11 | 9.69 [5.74,15.31]   | 10               | 1.00 | 1.09                           | 0.11 | 9.97 [4.78,18.33]   |
| <b>Data Partner 4</b> |                  |      |                                |      |                     |                  |      |                                |      |                     |
| Dose 1                | 2                | 1.15 | 0.26                           | 0.15 | 1.74 [0.21,6.28]    | 4                | 0.59 | 1.03                           | 0.15 | 6.80 [1.85,17.40]   |
| Dose 2                | 8                | 0.93 | 1.30                           | 0.15 | 8.57 [3.70, 16.89]  | 10               | 0.46 | 3.26                           | 0.15 | 21.53 [10.33,39.60] |
| Any Dose              | 10               | 2.08 | 0.73                           | 0.15 | 4.80 [2.30,8.82]    | 14               | 1.05 | 2.01                           | 0.15 | 13.30 [7.27,22.31]  |

\*\* Data Partner 1 observed versus expected rates are not displayed due to background rates in this data partner only being estimated among a select population; O=Observed rate after vaccination in the databases; E=Expected rate in the absence of vaccination, i.e., incidence rates estimated within each database in 2019 stratified by sex and age; Expected rate is not available in Data Partner 1 as the database population is a subset of the whole population having observed biologics use or meeting other inclusion criteria; CI=confidence interval;

**Supplemental Table 5. Direct head-to-head comparison of mRNA-1273 and BNT162b2, incidence rates (IRs) and incidence rate ratios (IRRs)**

**comparing the risk of myocarditis/pericarditis following 1–7 days of vaccination, for females aged 18–25 years by brand, dose number, and database**

|                       | BNT162b2                |                           |                                     | mRNA-1273               |                           |                                     | mRNA-1273 vs. BNT162b2 |                        |
|-----------------------|-------------------------|---------------------------|-------------------------------------|-------------------------|---------------------------|-------------------------------------|------------------------|------------------------|
|                       | Number of vaccine doses | Number of observed events | IR per 100,000 person-days [95% CI] | Number of vaccine doses | Number of observed events | IR per 100,000 person-days [95% CI] | IRR [95% CI]           | Excess Risk [95% CI]   |
| <b>Data Partner 1</b> |                         |                           |                                     |                         |                           |                                     |                        |                        |
| <b>Any dose</b>       | 537504                  | 11                        | 0.27 [0.14,0.50]                    | 254242                  | 7                         | 0.40 [0.20,0.80]                    | 1.48 [0.60,3.63]       | 9.05 [-16.30,34.40]    |
| <b>Dose 1</b>         | 298625                  | 3                         | 0.11 [0.04,0.36]                    | 140287                  | 3                         | 0.28 [0.09,0.87]                    | 2.46 [0.49,12.22]      | 11.46 [-19.90,42.81]   |
| <b>Dose 2</b>         | 238879                  | 8                         | 0.49 [0.24,1.00]                    | 113955                  | 4                         | 0.54 [0.20,1.43]                    | 1.10 [0.33,3.66]       | 3.34 [-48.79,55.46]    |
| <b>Data Partner 2</b> |                         |                           |                                     |                         |                           |                                     |                        |                        |
| <b>Any dose</b>       | 184986                  | 2                         | 0.15 [0.04,0.58]                    | 94998                   | 3                         | 0.43 [0.13,1.38]                    | 2.90 [0.5,16.74]       | 19.52 [-30.21,69.26]   |
| <b>Dose 1</b>         | 101866                  | 1                         | 0.11 [0.02,0.84]                    | 52966                   | 1                         | 0.23 [0.03,1.67]                    | 2.00 [0.12,32.13]      | 7.95 [-59.51,75.41]    |
| <b>Dose 2</b>         | 83120                   | 1                         | 0.18 [0.03,1.26]                    | 42032                   | 2                         | 0.67 [0.17,2.72]                    | 3.80 [0.34,41.94]      | 34.65 [-75.76,145.06]  |
| <b>Data Partner 3</b> |                         |                           |                                     |                         |                           |                                     |                        |                        |
| <b>Any dose</b>       | 310127                  | 4                         | 0.17 [0.07,0.41]                    | 161650                  | 2                         | 0.18 [0.04,0.71]                    | 1.06 [0.20,5.73]       | 0.70 [-26.40,27.80]    |
| <b>Dose 1</b>         | 171200                  | 0                         | 0.0 [NE,NE]                         | 90709                   | 1                         | 0.16 [0.02,1.15]                    | NE [NE,NE]             | NE [NE,NE]             |
| <b>Dose 2</b>         | 138927                  | 4                         | 0.34 [0.12,0.99]                    | 70941                   | 1                         | 0.18 [0.03,1.32]                    | 0.53 [0.06,4.78]       | -11.04 [-70.02,47.95]  |
| <b>Data Partner 4</b> |                         |                           |                                     |                         |                           |                                     |                        |                        |
| <b>Any dose</b>       | 253007                  | 9                         | 0.51 [0.27,0.97]                    | 127254                  | 1                         | 0.12 [0.02,0.85]                    | 0.23 [0.03,1.85]       | -27.66 [-68.32,13.01]  |
| <b>Dose 1</b>         | 141603                  | 2                         | 0.20 [0.05,0.82]                    | 72107                   | 0                         | 0.00 [NE,NE]                        | 0.00 [NE,NE]           | NE [NE,NE]             |
| <b>Dose 2</b>         | 111404                  | 7                         | 0.89 [0.42,1.89]                    | 55147                   | 1                         | 0.25 [0.04,1.82]                    | 0.29 [0.04,2.34]       | -44.26 [-127.06,38.53] |
| <b>Meta-Analysis</b>  |                         |                           |                                     |                         |                           |                                     |                        |                        |
| <b>Any dose</b>       | 1285624                 | 26                        | 0.28 [0.16,0.48]                    | 638144                  | 13                        | 0.33 [0.19,0.56]                    | 1.21 [0.52,2.81]       | 3.67 [-10.60,17.94]    |
| <b>Dose 1</b>         | 713294                  | 6                         | 0.11 [0.04,0.31]                    | 356069                  | 5                         | 0.26 [0.10,0.71]                    | 2.33 [0.58,9.36]       | 10.51 [-13.15,34.18]   |
| <b>Dose 2</b>         | 572330                  | 20                        | 0.52 [0.31,0.88]                    | 282057                  | 8                         | 0.45 [0.23,0.91]                    | 0.91 [0.38,2.19]       | -4.84 [-43.23,33.55]   |

CI=confidence interval; IR=incidence rate; IRR=incidence rate ratio; NE=not estimated.

Excess Risk = Difference in incident cases per million doses between mRNA-1273 and BNT162b2 (reference) based on adjusted incidence rates, assuming 7 days at risk.

Any dose models adjusted for urban/rural residency status (Data Partner 2, Data Partner 3, Data Partner 4), COVID-19 diagnosis prior to vaccination (Data Partner 1, Data Partner 2, Data Partner 4), and week of vaccination (all databases). Dose 1 models adjusted for COVID-19 prior to vaccination (Data Partner 1,

Data Partner 2), urban/rural residency status (Data Partner 3), and week of vaccination (all databases). Dose 2 models adjusted for urban/rural residency status (Data Partner 2, Data Partner 4), COVID-19 prior to vaccination (Data Partner 2, Data Partner 4), and week of vaccination (all databases).

**Supplemental Table 6. Direct head-to-head comparison of mRNA-1273 and BNT162b2, incidence rates (IRs) and incidence rate ratios (IRRs)**

**comparing the risk of myocarditis/pericarditis following 1–7 days of vaccination, for males aged 18–35 years by brand, dose number, and database**

|                       | BNT162b2                |                           |                                     | mRNA-1273               |                           |                                     | mRNA-1273 vs. BNT162b2 |                      |
|-----------------------|-------------------------|---------------------------|-------------------------------------|-------------------------|---------------------------|-------------------------------------|------------------------|----------------------|
|                       | Number of vaccine doses | Number of observed events | IR per 100,000 person-days [95% CI] | Number of vaccine doses | Number of observed events | IR per 100,000 person-days [95% CI] | IRR [95% CI]           | Excess Risk [95% CI] |
| <b>Data Partner 1</b> |                         |                           |                                     |                         |                           |                                     |                        |                      |
| <b>Any dose</b>       | 964263                  | 34                        | 0.49 [0.32,0.75]                    | 534213                  | 24                        | 0.67 [0.44,1.03]                    | 1.37 [0.75,2.51]       | 12.74 [-9.26,34.75]  |
| <b>Dose 1</b>         | 534287                  | 7                         | 0.19 [0.09,0.40]                    | 291979                  | 4                         | 0.21 [0.08,0.56]                    | 1.11 [0.32,3.80]       | 1.40 [-18.98,21.78]  |
| <b>Dose 2</b>         | 429976                  | 27                        | 0.90 [0.61,1.33]                    | 242234                  | 20                        | 1.24 [0.80,1.92]                    | 1.37 [0.77,2.45]       | 23.55 [-22.00,69.09] |
| <b>Data Partner 2</b> |                         |                           |                                     |                         |                           |                                     |                        |                      |
| <b>Any dose</b>       | 378025                  | 16                        | 0.59 [0.33,1.05]                    | 206861                  | 8                         | 0.56 [0.27,1.17]                    | 0.95 [0.37,2.42]       | -2.00 [-37.70,33.70] |
| <b>Dose 1</b>         | 207639                  | 2                         | 0.14 [0.03,0.56]                    | 114264                  | 1                         | 0.13 [0.02,0.93]                    | 0.96 [0.09,10.61]      | -0.40 [-46.31,45.52] |
| <b>Dose 2</b>         | 170386                  | 14                        | 1.21 [0.71,2.07]                    | 92597                   | 7                         | 1.13 [0.54,2.38]                    | 0.93 [0.38,2.31]       | -5.85 [-80.59,68.88] |
| <b>Data Partner 3</b> |                         |                           |                                     |                         |                           |                                     |                        |                      |
| <b>Any dose</b>       | 580336                  | 27                        | 0.60 [0.39,0.90]                    | 322397                  | 16                        | 0.66 [0.40,1.10]                    | 1.12 [0.58,2.14]       | 4.84 [-24.93,34.60]  |
| <b>Dose 1</b>         | 319620                  | 8                         | 0.33 [0.16,0.67]                    | 179137                  | 6                         | 0.47 [0.21,1.06]                    | 1.44 [0.50,4.18]       | 10.07 [-25.57,45.71] |
| <b>Dose 2</b>         | 260716                  | 19                        | 0.95 [0.59,1.53]                    | 143260                  | 10                        | 0.91 [0.48,1.72]                    | 0.96 [0.45,2.07]       | -2.55 [-54.27,49.18] |
| <b>Data Partner 4</b> |                         |                           |                                     |                         |                           |                                     |                        |                      |
| <b>Any dose</b>       | 535419                  | 22                        | 0.59 [0.37,0.97]                    | 285457                  | 21                        | 1.11 [0.68,1.80]                    | 1.86 [0.94,3.70]       | 35.86 [-3.62,75.34]  |
| <b>Dose 1</b>         | 298863                  | 6                         | 0.28 [0.12,0.63]                    | 160218                  | 4                         | 0.37 [0.14,0.98]                    | 1.31 [0.37,4.65]       | 6.06 [-28.99,41.11]  |
| <b>Dose 2</b>         | 236556                  | 16                        | 1.00 [0.61,1.64]                    | 125239                  | 17                        | 2.02 [1.25,3.26]                    | 2.02 [1.02,4.01]       | 71.59 [-4.48,147.66] |
| <b>Meta-Analysis</b>  |                         |                           |                                     |                         |                           |                                     |                        |                      |
| <b>Any dose</b>       | 2458043                 | 99                        | 0.56 [0.44,0.71]                    | 1348928                 | 69                        | 0.75 [0.57,0.99]                    | 1.33 [0.94,1.88]       | 13.22 [-7.95,34.39]  |

CI=confidence interval; IR=incidence rate; IRR=incidence rate ratio.

Excess Risk = Difference in incident cases per million doses between mRNA-1273 and BNT162b2 (reference) based on adjusted incidence rates, assuming 7 days at risk.

Any dose models adjusted for urban/rural residency status (Data Partner 3, Data Partner 4), COVID-19 diagnosis prior to vaccination (all databases), and week of vaccination (all databases). Dose 1 models adjusted for urban/rural residency status (Data Partner 3), COVID-19 prior to vaccination (Data Partner 1, Data Partner 3, Data Partner 4), and week of vaccination (all databases). Dose 2 models adjusted for urban/rural residency status (Data Partner 3, Data Partner 4), COVID-19 prior to vaccination (all databases), and week of vaccination (all databases).

**Supplemental Table 7. Direct head-to-head comparison of mRNA-1273 and BNT162b2, incidence rates (IRs) and incidence rate ratios (IRRs)**

**comparing the risk of myocarditis/pericarditis restricted to IP and OP/ED events following 1–7 days of vaccination, for males aged 18–25 years by brand, dose number, and database**

|                       | BNT162b2                |                           |                                     | mRNA-1273               |                           |                                     | mRNA-1273 vs. BNT162b2 |                         |
|-----------------------|-------------------------|---------------------------|-------------------------------------|-------------------------|---------------------------|-------------------------------------|------------------------|-------------------------|
|                       | Number of vaccine doses | Number of observed events | IR per 100,000 person-days [95% CI] | Number of vaccine doses | Number of observed events | IR per 100,000 person-days [95% CI] | IRR [95% CI]           | Excess Risk [95% CI]    |
| <b>Data Partner 1</b> |                         |                           |                                     |                         |                           |                                     |                        |                         |
| Any dose              | 449020                  | 18                        | 0.57 [0.35,0.94]                    | 211821                  | 9                         | 0.64 [0.33,1.25]                    | 1.11 [0.48,2.60]       | 4.62 [-32.47,41.70]     |
| Dose 1                | 250271                  | 3                         | 0.17 [0.05,0.53]                    | 117192                  | 2                         | 0.26 [0.06,1.03]                    | 1.51 [0.25,9.07]       | 6.04 [-32.09,44.17]     |
| Dose 2                | 198749                  | 15                        | 1.15 [0.69,1.91]                    | 94629                   | 7                         | 1.14 [0.54,2.40]                    | 1.00 [0.41,2.44]       | -0.38 [-77.74,76.97]    |
| <b>Data Partner 2</b> |                         |                           |                                     |                         |                           |                                     |                        |                         |
| Any dose              | 159435                  | 9                         | 0.81 [0.43,1.52]                    | 84586                   | 4                         | 0.70 [0.29,1.69]                    | 0.87 [0.29,2.57]       | -7.47 [-75.18,60.23]    |
| Dose 1                | 87769                   | 1                         | 0.17 [0.02,1.25]                    | 47301                   | 1                         | 0.30 [0.04,2.29]                    | 1.74 [0.11,28.22]      | 8.95 [-93.19,111.09]    |
| Dose 2                | 71666                   | 8                         | 1.67 [0.83,3.37]                    | 37285                   | 3                         | 1.22 [0.39,3.78]                    | 0.73 [0.19,2.75]       | -31.59 [-177.67,114.49] |
| <b>Data Partner 3</b> |                         |                           |                                     |                         |                           |                                     |                        |                         |
| Any dose              | 262536                  | 12                        | 0.57 [0.31,1.05]                    | 139732                  | 7                         | 0.64 [0.34,1.22]                    | 1.12 [0.46,2.74]       | 4.94 [-40.20, 50.08]    |
| Dose 1                | 145109                  | 3                         | 0.28 [0.09,0.90]                    | 78572                   | 1                         | 0.18 [0.02,1.28]                    | 0.62 [0.06,6.03]       | -7.49 [-70.73, 55.76]   |
| Dose 2                | 117427                  | 9                         | 0.94 [0.47,1.88]                    | 61160                   | 6                         | 1.20 [0.52,2.76]                    | 1.28 [0.45,3.60]       | 18.29 [-79.82, 116.41]  |
| <b>Data Partner 4</b> |                         |                           |                                     |                         |                           |                                     |                        |                         |
| Any dose              | 209473                  | 9                         | 0.64 [0.34,1.19]                    | 106271                  | 9                         | 1.29 [0.67,2.47]                    | 2.02 [0.83,4.95]       | 45.67 [-27.53,118.87]   |
| Dose 1                | 116908                  | 1                         | 0.10 [0.01,0.76]                    | 59925                   | 2                         | 0.38 [0.08,1.74]                    | 3.95 [0.36,43.71]      | 20.03 [-41.85,81.92]    |
| Dose 2                | 92565                   | 8                         | 1.29 [0.64,2.57]                    | 46346                   | 7                         | 2.27 [1.08,4.77]                    | 1.76 [0.64,4.87]       | 68.76 [-72.59, 210.11]  |
| <b>Meta-Analysis</b>  |                         |                           |                                     |                         |                           |                                     |                        |                         |
| Any dose              | 1080464                 | 48                        | 0.63 [0.47,0.84]                    | 542410                  | 29                        | 0.79 [0.56,1.13]                    | 1.25 [0.79,1.98]       | 11.40 [-17.92,40.72]    |

CI=confidence interval; IR=incidence rate; IRR=incidence rate ratio.

Excess Risk = Difference in incident cases per million doses between mRNA-1273 and BNT162b2 (reference) based on adjusted incidence rates, assuming 7 days at risk.

Any dose models adjusted for urban/rural residency status (Data Partner 3, Data Partner 4), COVID-19 diagnosis prior to vaccination (Data Partner 1, Data Partner 3, Data Partner 4), and week of vaccination (all databases). Dose 1 models adjusted for urban/rural residency status (Data Partner 3), COVID-19 prior to vaccination (Data Partner 1, Data Partner 3, Data Partner 4), and week of vaccination (all databases). Dose 2 models adjusted for urban/rural residency status (Data Partner 3, Data Partner 4), COVID-19 prior to vaccination (Data Partner 3), and week of vaccination (all databases).

**Supplemental Table 8. Direct head-to-head comparison of mRNA-1273 and BNT162b2, incidence rates (IRs) and incidence rate ratios (IRRs)**

**comparing the risk of myocarditis/pericarditis restricted to IP and OP/ED events following 1–7 days of vaccination, for males aged 18–35 years by brand, dose number, and database**

|                       |                         |                           | BNT162b2                            |                         | mRNA-1273                 |                                     | mRNA-1273 vs. BNT162b2 |                        |
|-----------------------|-------------------------|---------------------------|-------------------------------------|-------------------------|---------------------------|-------------------------------------|------------------------|------------------------|
|                       | Number of vaccine doses | Number of observed events | IR per 100,000 person-days [95% CI] | Number of vaccine doses | Number of observed events | IR per 100,000 person-days [95% CI] | IRR [95% CI]           | Excess Risk [95% CI]   |
| <b>Data Partner 1</b> |                         |                           |                                     |                         |                           |                                     |                        |                        |
| <b>Any dose</b>       | 964263                  | 22                        | 0.32 [0.20,0.50]                    | 534213                  | 12                        | 0.33 [0.19,0.60]                    | 1.06 [0.51,2.21]       | 1.27 [-15.42, 17.96]   |
| <b>Dose 1</b>         | 534287                  | 5                         | 0.13 [0.05,0.32]                    | 291979                  | 2                         | 0.10 [0.03,0.41]                    | 0.79 [0.15,4.11]       | -1.89 [-18.17, 14.40]  |
| <b>Dose 2</b>         | 429976                  | 17                        | 0.58 [0.36,0.95]                    | 242234                  | 10                        | 0.63 [0.34,1.17]                    | 1.07 [0.49,2.35]       | 3.06 [-33.20, 39.32]   |
| <b>Data Partner 2</b> |                         |                           |                                     |                         |                           |                                     |                        |                        |
| <b>Any dose</b>       | 378025                  | 12                        | 0.45 [0.24, 0.84]                   | 206861                  | 5                         | 0.35 [0.14,0.91]                    | 0.79 [0.25,2.50]       | -6.52 [-37.92, 24.88]  |
| <b>Dose 1</b>         | 207639                  | 1                         | 0.08 [0.01,0.53]                    | 114264                  | 1                         | 0.13 [0.02,0.95]                    | 1.75 [0.11,28.26]      | 3.90 [-48.60, 56.40]   |
| <b>Dose 2</b>         | 170386                  | 11                        | 0.95 [0.52, 1.74]                   | 92597                   | 4                         | 0.64 [0.24,1.72]                    | 0.68 [0.22,2.13]       | -21.39 [-91.58, 48.80] |
| <b>Data Partner 3</b> |                         |                           |                                     |                         |                           |                                     |                        |                        |
| <b>Any dose</b>       | 580336                  | 15                        | 0.32 [0.17,0.59]                    | 322397                  | 12                        | 0.47 [0.28,0.80]                    | 1.48 [0.67, 3.23]      | 10.58 [-12.58, 33.74]  |
| <b>Dose 1</b>         | 319620                  | 5                         | 0.22 [0.09,0.54]                    | 179137                  | 4                         | 0.31 [0.11, 0.85]                   | 1.44 [0.38,5.41]       | 6.64 [-23.21, 36.50]   |
| <b>Dose 2</b>         | 260716                  | 10                        | 0.46 [0.24,0.89]                    | 143260                  | 8                         | 0.66 [0.32,1.38]                    | 1.45 [0.57, 3.69]      | 14.44 [-26.90, 55.79]  |
| <b>Data Partner 4</b> |                         |                           |                                     |                         |                           |                                     |                        |                        |
| <b>Any dose</b>       | 535419                  | 15                        | 0.42 [0.24, 0.72]                   | 285457                  | 15                        | 0.80 [0.42, 1.52]                   | 1.92 [0.83,4.47]       | 26.76 [-6.00, 59.52]   |
| <b>Dose 1</b>         | 298863                  | 1                         | 0.04 [0.01, 0.30]                   | 160218                  | 2                         | 0.14 [0.03, 0.65]                   | 3.75 [0.34,41.47]      | 7.36 [-20.87, 35.60]   |
| <b>Dose 2</b>         | 236556                  | 14                        | 0.88 [0.52, 1.48]                   | 125239                  | 13                        | 1.55 [0.90, 2.68]                   | 1.77 [0.83, 3.77]      | 47.17 [-21.16, 115.50] |
| <b>Meta-Analysis</b>  |                         |                           |                                     |                         |                           |                                     |                        |                        |
| <b>Any dose</b>       | 2458043                 | 64                        | 0.36 [0.28,0.48]                    | 1348928                 | 44                        | 0.47 [0.32,0.68]                    | 1.30 [0.85, 1.98]      | 7.38 [-6.19, 20.96]    |

CI=confidence interval; IR=incidence rate; IRR=incidence rate ratio.

Excess Risk = Difference in incident cases per million doses between mRNA-1273 and BNT162b2 (reference) based on adjusted incidence rates, assuming 7 days at risk.

Any dose models adjusted for urban/rural residency status (Data Partner 3, Data Partner 4), COVID-19 diagnosis prior to vaccination (Data Partner 1, Data Partner 3, Data Partner 4), and week of vaccination (all databases). Dose 1 models adjusted for urban/rural residency status (Data Partner 3), COVID-19 prior to vaccination (Data Partner 1, Data Partner 3, Data Partner 4), and week of vaccination (all databases). Dose 2 models adjusted for urban/rural residency status (Data Partner 3, Data Partner 4), COVID-19 prior to vaccination (Data Partner 3), and week of vaccination (all databases).

**Supplemental Table 9. Direct head-to-head comparison of mRNA-1273 and BNT162b2, incidence rates (IRs) and incidence rate ratios (IRRs)**

**comparing the risk of myocarditis/pericarditis following 1–21 days of vaccination, for males aged 18–25 years by brand, dose number, and database**

|                       | BNT162b2                |                           |                                     | mRNA-1273               |                           |                                     | mRNA-1273 vs. BNT162b2 |                        |
|-----------------------|-------------------------|---------------------------|-------------------------------------|-------------------------|---------------------------|-------------------------------------|------------------------|------------------------|
|                       | Number of vaccine doses | Number of observed events | IR per 100,000 person-days [95% CI] | Number of vaccine doses | Number of observed events | IR per 100,000 person-days [95% CI] | IRR [95% CI]           | Excess Risk [95% CI]   |
| <b>Data Partner 1</b> |                         |                           |                                     |                         |                           |                                     |                        |                        |
| <b>Any dose</b>       | 449020                  | 42                        | 0.48 [0.33,0.70]                    | 211821                  | 24                        | 0.59 [0.36,0.97]                    | 1.23 [0.66,2.30]       | 25.28 [5.22,45.33]     |
| <b>Dose 1</b>         | 250271                  | 10                        | 0.21 [0.11,0.38]                    | 117192                  | 7                         | 0.31 [0.15,0.64]                    | 1.49 [0.57,3.91]       | 23.19 [1.74,44.65]     |
| <b>Dose 2</b>         | 198749                  | 32                        | 0.84 [0.59,1.19]                    | 94629                   | 17                        | 0.94 [0.58,1.51]                    | 1.12 [0.62,2.02]       | 21.19 [-18.37,60.75]   |
| <b>Data Partner 2</b> |                         |                           |                                     |                         |                           |                                     |                        |                        |
| <b>Any dose</b>       | 159435                  | 12                        | 0.37 [0.19,0.70]                    | 84586                   | 7                         | 0.42 [0.22,0.80]                    | 1.13 [0.45,2.84]       | 11.99 [-16.95,40.92]   |
| <b>Dose 1</b>         | 87769                   | 1                         | 0.06 [0.01,0.39]                    | 47301                   | 1                         | 0.11 [0.01,0.75]                    | 1.92 [0.12,30.68]      | 11.16 [-25.96,48.27]   |
| <b>Dose 2</b>         | 71666                   | 11                        | 0.78 [0.43,1.41]                    | 37285                   | 6                         | 0.82 [0.37,1.84]                    | 1.06 [0.39,2.86]       | 9.47 [-53.83,72.77]    |
| <b>Data Partner 3</b> |                         |                           |                                     |                         |                           |                                     |                        |                        |
| <b>Any dose</b>       | 262536                  | 24                        | 0.44 [0.29,0.68]                    | 139732                  | 14                        | 0.49 [0.29,0.83]                    | 1.12 [0.57,2.19]       | 13.02 [-10.45,36.49]   |
| <b>Dose 1</b>         | 145109                  | 8                         | 0.27 [0.13,0.54]                    | 78572                   | 5                         | 0.32 [0.13,0.76]                    | 1.17 [0.38,3.60]       | 12.51 [-14.46,39.48]   |
| <b>Dose 2</b>         | 117427                  | 16                        | 0.66 [0.40,1.09]                    | 61160                   | 9                         | 0.71 [0.37,1.38]                    | 1.08 [0.48,2.45]       | 11.54 [-31.96,55.04]   |
| <b>Data Partner 4</b> |                         |                           |                                     |                         |                           |                                     |                        |                        |
| <b>Any dose</b>       | 209473                  | 15                        | 0.35 [0.22,0.56]                    | 106271                  | 18                        | 0.87 [0.54,1.38]                    | 2.47 [1.28,4.76]       | 109.96 [77.32,142.59]  |
| <b>Dose 1</b>         | 116908                  | 5                         | 0.20 [0.08,0.49]                    | 59925                   | 5                         | 0.43 [0.18,1.02]                    | 2.08 [0.60,7.18]       | 48.35 [13.45,83.25]    |
| <b>Dose 2</b>         | 92565                   | 10                        | 0.54 [0.29,1.00]                    | 46346                   | 13                        | 1.43 [0.83,2.46]                    | 2.65 [1.16,6.05]       | 186.80 [125.36,248.23] |
| <b>Meta-Analysis</b>  |                         |                           |                                     |                         |                           |                                     |                        |                        |
| <b>Any dose</b>       | 1080464                 | 93                        | 0.42 [0.34,0.53]                    | 542410                  | 63                        | 0.59 [0.44,0.81]                    | 1.43 [0.98,2.10]       | 38.13 [14.73,61.52]    |

CI=confidence interval; IR=incidence rate; IRR=incidence rate ratio.

Excess Risk = Difference in incident cases per million doses between mRNA-1273 and BNT162b2 (reference) based on adjusted incidence rates, assuming 21 days at risk.

Any dose models adjusted for urban/rural residency status (Data Partner 2, Data Partner 3, Data Partner 4), COVID-19 diagnosis prior to vaccination (all databases), and week of vaccination (all databases). Dose 1 models adjusted for urban/rural residency status (Data Partner 3, Data Partner 4), COVID-19 prior to vaccination (all databases), and week of vaccination (all databases). Dose 2 models adjusted for urban/rural residency status (Data Partner 2, Data Partner 3, Data Partner 4), COVID-19 prior to vaccination (all databases), and week of vaccination (all databases).

**Supplemental Table 10. Direct head-to-head comparison of mRNA-1273 and BNT162b2, incidence rates (IRs) and incidence rate ratios (IRRs)**

**comparing the risk of myocarditis/pericarditis following 1–42 days of vaccination, for males aged 18–25 years by brand, dose number, and database**

|                       | BNT162b2                |                           |                                     | mRNA-1273               |                           |                                     | mRNA-1273 vs. BNT162b2 |                        |
|-----------------------|-------------------------|---------------------------|-------------------------------------|-------------------------|---------------------------|-------------------------------------|------------------------|------------------------|
|                       | Number of vaccine doses | Number of observed events | IR per 100,000 person-days [95% CI] | Number of vaccine doses | Number of observed events | IR per 100,000 person-days [95% CI] | IRR [95% CI]           | Excess Risk [95% CI]   |
| <b>Data Partner 1</b> |                         |                           |                                     |                         |                           |                                     |                        |                        |
| <b>Any dose</b>       | 449020                  | 50                        | 0.38 [0.27,0.53]                    | 211821                  | 31                        | 0.45 [0.30,0.68]                    | 1.19 [0.70,2.02]       | 38.04 [24.40,51.67]    |
| <b>Dose 1</b>         | 250271                  | 14                        | 0.24 [0.14,0.41]                    | 117192                  | 9                         | 0.27 [0.14,0.52]                    | 1.10 [0.47,2.54]       | 23.58 [6.41,40.75]     |
| <b>Dose 2</b>         | 198749                  | 36                        | 0.49 [0.35,0.68]                    | 94629                   | 22                        | 0.62 [0.41,0.94]                    | 1.26 [0.74,2.15]       | 54.21 [32.36,76.06]    |
| <b>Data Partner 2</b> |                         |                           |                                     |                         |                           |                                     |                        |                        |
| <b>Any dose</b>       | 159435                  | 17                        | 0.35 [0.21,0.57]                    | 84586                   | 10                        | 0.36 [0.21,0.61]                    | 1.03 [0.50,2.13]       | 16.09 [-4.97,37.15]    |
| <b>Dose 1</b>         | 87769                   | 3                         | 0.14 [0.04,0.43]                    | 47301                   | 4                         | 0.29 [0.11,0.76]                    | 2.09 [0.47,9.34]       | 49.82 [22.17,77.48]    |
| <b>Dose 2</b>         | 71666                   | 14                        | 0.52 [0.31,0.88]                    | 37285                   | 6                         | 0.43 [0.19,0.95]                    | 0.83 [0.32,2.15]       | -37.70 [-72.38,-3.01]  |
| <b>Data Partner 3</b> |                         |                           |                                     |                         |                           |                                     |                        |                        |
| <b>Any dose</b>       | 262536                  | 32                        | 0.38 [0.27,0.53]                    | 139732                  | 16                        | 0.33 [0.21,0.53]                    | 0.88 [0.50,1.58]       | -1.76 [-17.26,13.74]   |
| <b>Dose 1</b>         | 145109                  | 13                        | 0.35 [0.20,0.61]                    | 78572                   | 6                         | 0.26 [0.11,0.57]                    | 0.73 [0.28,1.92]       | -1.08 [-22.77,20.60]   |
| <b>Dose 2</b>         | 117427                  | 19                        | 0.40 [0.25,0.63]                    | 61160                   | 10                        | 0.40 [0.22,0.75]                    | 1.02 [0.47,2.19]       | 3.05 [-20.31,26.41]    |
| <b>Data Partner 4</b> |                         |                           |                                     |                         |                           |                                     |                        |                        |
| <b>Any dose</b>       | 209473                  | 18                        | 0.28 [0.18,0.44]                    | 106271                  | 21                        | 0.61 [0.38,0.96]                    | 2.19 [1.14,4.19]       | 123.59 [101.66,145.51] |
| <b>Dose 1</b>         | 116908                  | 5                         | 0.17 [0.07,0.41]                    | 59925                   | 7                         | 0.41 [0.20,0.86]                    | 2.42 [0.77,7.62]       | 76.92 [49.63,104.21]   |
| <b>Dose 2</b>         | 92565                   | 13                        | 0.36 [0.21,0.63]                    | 46346                   | 14                        | 0.79 [0.47,1.34]                    | 2.17 [1.02,4.63]       | 179.67 [144.86,214.49] |
| <b>Meta-Analysis</b>  |                         |                           |                                     |                         |                           |                                     |                        |                        |
| <b>Any dose</b>       | 1080464                 | 117                       | 0.35 [0.29,0.43]                    | 542410                  | 78                        | 0.43 [0.33,0.56]                    | 1.23 [0.84,1.80]       | 39.36 [22.82,55.90]    |

CI=confidence interval; IR=incidence rate; IRR=incidence rate ratio.

Excess Risk = Difference in incident cases per million doses between mRNA-1273 and BNT162b2 (reference) based on adjusted incidence rates, assuming 42 days at risk.

Any dose models adjusted for urban/rural residency status (Data Partner 2,Data Partner 3, Data Partner 4), COVID-19 diagnosis prior to vaccination (all databases), and week of vaccination (all databases). Dose 1 models adjusted for urban/rural residency status (Data Partner 2,Data Partner 3, Data Partner 4), COVID-19 prior to vaccination (all databases), and week of vaccination (all databases). Dose 2 models adjusted for urban/rural residency status (Data Partner 2,Data Partner 3, Data Partner 4), COVID-19 prior to vaccination (all databases), and week of vaccination (all databases).



**Supplemental Figure 1. mRNA-1273 and BNT162b2 COVID-19 Accrual by Week, 18–64 years**

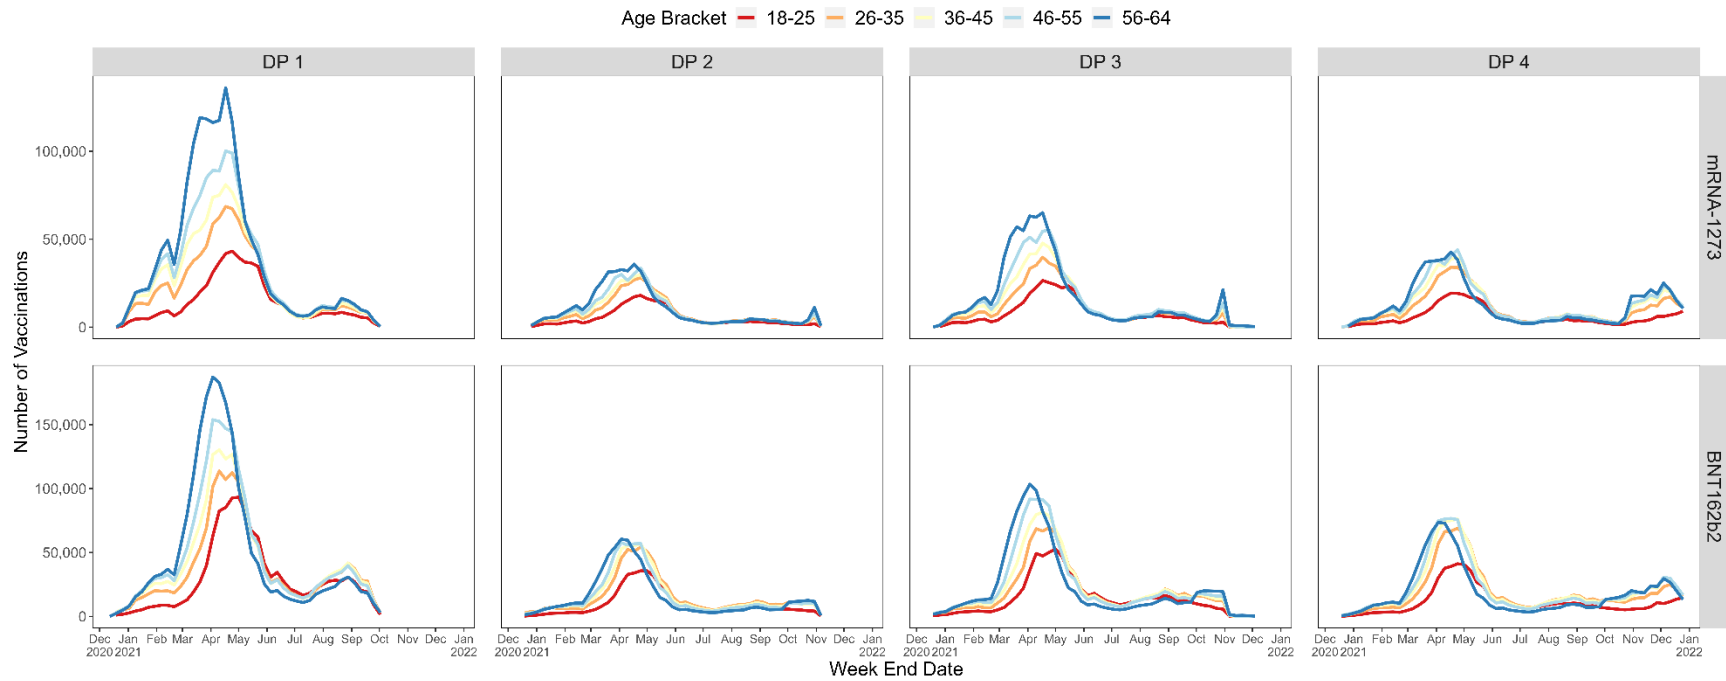

Data cutoff date: Data Partner 1 (9/30/2021), Data Partner 2 (10/31/2021), Data Partner 3 (11/4/2021), Data Partner 4 (12/25/2021)  
 Figure displays Dose 1, Dose 2, and other doses. Vaccine counts for recent dates may be underestimated due to data delay.

## Appendix. Person-Time Adjustment for Observation Delay

Person-time attributed to each vaccination will be adjusted for observation delay ( $time_{adj}$ ). The adjustment will be performed by segmenting study time for each vaccination by weeks of delay relative to the data cut date, and then multiplying the time by an estimated proportion of ‘data completeness’ obtained from historical data. Within each stratum defined by vaccine, age, sex, and other covariates, the adjusted time will be calculated as follows:

$$time_{adj} = \sum_{t=1}^s \sum_{i=1}^{n_t} \sum_{w=0}^{T_i} l_{stiw} P(s, t, w)$$

Where:

- $s$  represents the study time period (e.g., study week) at which the analysis is planned (e.g.,  $s = 15$ )
- $t$  in  $1 \dots s$ .
- $n_t$  is the number of subjects vaccinated during time period  $t$ . Ineligible doses due to lack of enrollment or having an AESI in the cleaning period will be excluded.
- $i$  in  $1 \dots n_t$ .
- $T_i$  represents the exposed weeks at risk following a dose (i.e., within the AESI-specific risk window) for subject  $i$ .
- $w$  in  $0 \dots T_i$ . Study weeks in which AESIs occur are represented by  $t + w$ , with  $t + 0$  being the same study week as the vaccine dose,  $t + 1$  the next week, etc.
- $l_{stiw}$  in  $0 \dots 7$  is the number of exposed days following a vaccine dose in study week  $w$  post vaccine dose for a patient identified by  $i$ ,  $t$  in the group based on data at observation week  $s$ .
- If the dose is administered on day 5 of study week  $t$ , then the first 1–2 days of 1–42 days post-vaccination risk window would occur in  $w = 0$  post dose (with  $l_{sti(w=0)} = 2$ ). The next 3–9 days would occur in week  $w = 1$  post dose (with  $l_{sti(w=1)} = 7$ ), etc.
- The occurrence of a second dose may contribute additional exposed time but overlapping time will not be double counted. For example, if the risk window length is 42 days, a second dose 22 days after the first dose will result in an overall risk period of 1 to  $(42 + 42 - 21 \text{ overlap}) = 63$  days. In the case when the gap

between doses is larger than the risk interval post first dose, the follow-up after the first dose would be censored at the end of the planned risk window and restarted at the second dose.

- $P(s,t,w)$  is the proportion of AESIs occurring in study week  $t + w$  that would be observed by week  $s$ . This adjustment factor adjusts for the observation delay due to the use of partially accrued data.
- Cumulative proportion of data completeness will be estimated from myocarditis or pericarditis events in 2019 data.
- To account for variability in the observation delay adjustment for short delays (0–1 weeks), only events and person time 2 or more weeks delayed relative to the data cut date will be included in the analysis.
